# Supplementary material for: A dynamic anode boosting sulfamerazine mineralization via electrochemical oxidation
Source: Royal Society of Chemistry journal article supplement (doi:10.1039/d1ta08095d), 2021-11-03
Supplement: d1ta08095d1.pdf [file d1ta08095d1.pdf]

1 **A dynamic anode boosting sulfamerazine**  
2 **mineralization via electrochemical oxidation**

3

4 Fengxia Deng<sup>a</sup>, Jinyu Xie<sup>a</sup>, Orlando Garcia-Rodriguez<sup>d</sup>, Baojian Jing<sup>a</sup>, Yingshi Zhu<sup>a</sup>, Zhonglin

5 Chen<sup>a</sup>, Jyh-Ping Hsu<sup>c</sup>, Jizhou Jiang<sup>b,\*</sup>, Shunwen Bai<sup>a,\*</sup>, Shan Qiu<sup>a,\*</sup>

6 <sup>a</sup> State Key Laboratory of Urban Water Resources Centre, School of Environment, Harbin Institute  
7 of Technology, Harbin, 150090, P. R. China

8 <sup>b</sup> School of Environmental Ecology and Biological Engineering, School of Chemistry and  
9 Environmental Engineering, Key Laboratory of Green Chemical Engineering Process of Ministry  
10 of Education, Wuhan Institute of Technology, Wuhan, Hubei, 430205, P. R. China.

11 <sup>c</sup> Department of Chemical Engineering, National Taiwan University, Taipei 10617, Taiwan

12 <sup>d</sup> Centre for Water Research, Department of Civil and Environmental Engineering, National  
13 University of Singapore, 1 Engineering Dr. 2, Singapore, 117576, Singapore

14

15

16

17

18 \*Corresponding author:

19 027wi@163.com (Jizhou Jiang), Shunwen Bai (baishunwen@hit.edu.cn), qiushan@hit.edu.cn (Shan  
20 Qiu)

21

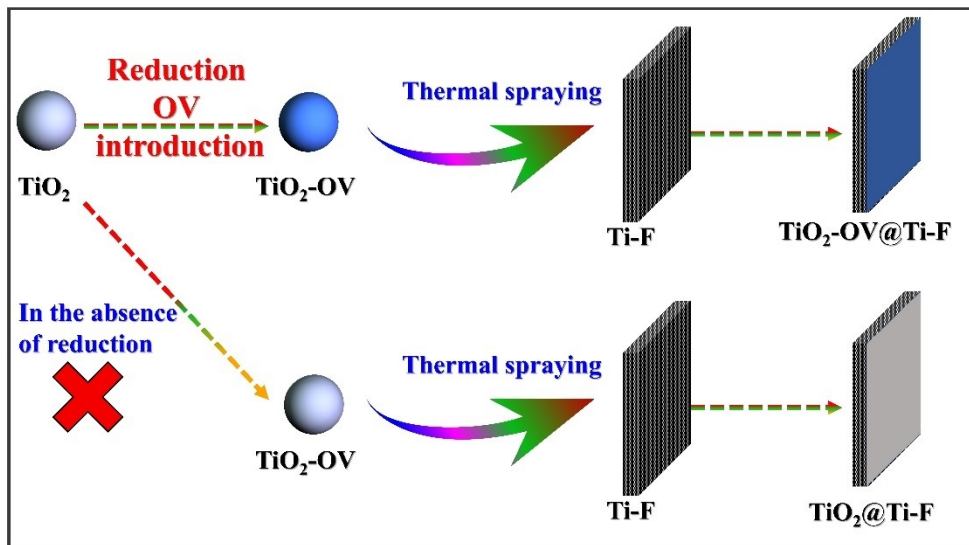

22

23 Fig. S1. The process to fabricate anodes in the absence and presence of oxygen  
 24 vacancies.

25

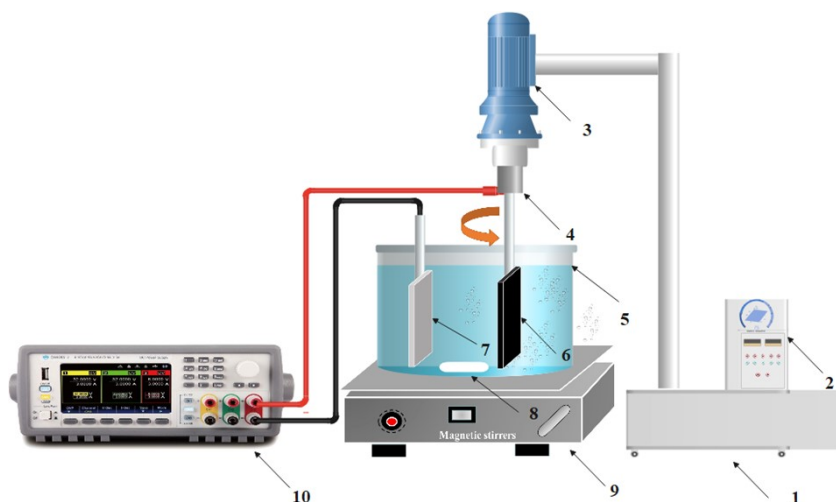

26

27 Fig. S2. The designed rotating system of electrochemical setup for SMR degradation.  
 28 (1) trestle table, (2) rotational speed control system, (3) electrical machinery, (4)  
 29 dynamo brush, (5) undivided single cell, (6) the designed anode, (7) count  
 30 cathode, (8) magnet rotor, (9) magnetic stirrer; (10) DC power.

31

32

33 **SI.1 DFT calculation**

34 Calculations on electronic ground state, cationic and anionic geometries  
35 described in this paper were performed at the DFT levels of theory as implemented  
36 within the Gaussian 03 software package [1] on the SGI origin 2000 server. Becke's  
37 three-parameter hybrid method using the Lee-Yang-Parr correlation functional  
38 (B3LYP) was employed, which was proven to be a very useful in predicting  
39 geometries.

40 The geometry, electron density and population analysis of  $\text{Ti}_4\text{O}_7$ ,  $\text{H}_2\text{O}$ ,  
41  $\text{Ti}_4\text{O}_7+\text{H}_2\text{O}$ ,  $\text{Ti}_4\text{O}_7+\text{HO}\cdots\text{H}$ ,  $\text{TiO}_2$ ,  $\text{TiO}_2+\text{H}_2\text{O}$ ,  $\text{TiO}_2+\text{HO}\cdots\text{H}$  were conducted using  
42 the plane-wave ultra-soft (PWUS) pseudo-potential method with the generalized  
43 gradient approximation (GGA) and correlation in the Perdew-Wang 91 (PW91) as  
44 implemented in the DMol3 DFT module of Materials Studio package calculation [2].  
45 A hybrid semiempirical solution (OBS) was taken to introduce damped atom pairwise  
46 dispersion corrections of the form  $C_6R^{-6}$  in the DFT-D formalism. In module of  
47 geometry optimization, the quality of convergence tolerance is set as medium, and the  
48 energy is set as  $2\times 10^{-5}$  Ha. The convergence criterion for the maximal force on atoms  
49 is  $0.004$  Ha/Å. The maximum displacement is  $5\times 10^{-3}$  Å. The maximum iteration is set  
50 as 200 and the maximum step size is  $0.3$  Å. The cell is also optimized with  
51 optimization cycles of 2 and displacement step of  $0.015$  Å. In module of geometry  
52 optimization, the quality of convergence tolerance is set as medium, and the energy as  
53  $2\times 10^{-5}$  Ha. The convergence criterion for the maximal force on atoms is  $0.004$  Ha/Å.  
54 The maximum displacement is  $5\times 10^{-3}$  Å. The maximum iteration is set at 200, and the  
55 maximum step size is  $0.3$  Å. The cell is also optimized with optimization cycles of 2  
56 and displacement step of  $0.015$  Å. In module of electronic optimization, the  
57 integration accuracy and self-consistent field (SCF) tolerance are both set as medium.  
58 All electrons are core treatment with a double numeric plus polarization (DNP) basis

59 set and the orbital cutoff quality is set as medium. The SCF convergence accuracy is  
60 set at  $1 \times 10^{-4}$  eV/atom, and the maximum SCF cycles at 512. Multipolar expansion of  
61 Hexadecapole and a Smearing of 0.05 are adopted. These calculations were carried  
62 out on an Intel Pentium PC computer with 12 cores and 32 GB of memory. The space  
63 group of  $\text{Ti}_4\text{O}_7$  crystal is  $P\bar{1}[2]$ , and the crystal system is tetragonal. The lattice  
64 parameters of  $\text{Ti}_4\text{O}_7$  are  $a=5.638 \text{ \AA}$ ,  $b=6.957 \text{ \AA}$ ,  $c=7.184 \text{ \AA}$ ,  $\alpha=64.178^\circ$ ,  $\beta=71.103^\circ$ ,  
65 and  $\gamma=75.110^\circ$ . The space group of anatase  $\text{TiO}_2$  crystal is  $I4_1/amd$  [141], and the  
66 crystal system is tetragonal. The lattice parameters of  $\text{TiO}_2$  are  $a=b=c=5.566 \text{ \AA}$ ,  
67  $\alpha=\beta=140.054^\circ$ , and  $\gamma=57.771^\circ$ . The anatase (101) surface was modeled as a slab with  
68 four  $\text{TiO}_2$  layers [3].

## 69 **SI.2 Life cycle assessment**

70 For  $\text{TiO}_2\text{-OV@Ti-F}$  anode, the primary data in life cycle inventory (LCI) were  
71 obtained via calculating the energy, chemical usage and environmental emissions  
72 along with whole laboratory experimental processes. Regarding other anodes, LCI  
73 was developed based on the existing information in the literature [4-6]. The secondary  
74 data utilized in background processes such as the production of electricity and  
75 chemicals, were taken from the ecoinvent 3.4 database. Details were given in **Table**  
76 **S1**.

77 Environmental impacts were assessed by the ReCiPe method comprising three  
78 environmental categories (ecosystem quality, human health, and resources) including  
79 a total of 17 end-point impact categories. To facilitate direct comparison between all  
80 the alternatives, a total environmental impact obtained by aggregating all the impact  
81 categories is used for each assessed anode. The relative impacts of each impact  
82 category were deduced by quantifying proportional correlation and conducting a  
83 contribution analysis to identify the major environmental contributors for each

84 alternative. To assess the robustness of the comparison outcome, a Monte Carlo  
85 simulation was performed to examine the uncertainty incurred by inventory  
86 variability. The use of open LCA software grants for the uncertainty propagation over  
87 inventory data with assumed normal distribution under 10000 independent  
88 simulations. In practice, the Monte Carlo simulation can be implemented throughout  
89 all the impact categories as well as the total environmental impacts. Since we mainly  
90 focused on the comparison of total environmental impact, the results of uncertainty  
91 test for other impact categories are presented in the Supporting Information (**Table**  
92 **S2-S4**).

93 A standardized four-step framework defined by the ISO 14040–14044 standards  
94 was used for LCA (International Organization for Standardization (ISO), 1997): i)  
95 goal and scope definition, ii) life cycle inventory, iii) life cycle impact assessment and  
96 IV) interpretation.

97

98

99

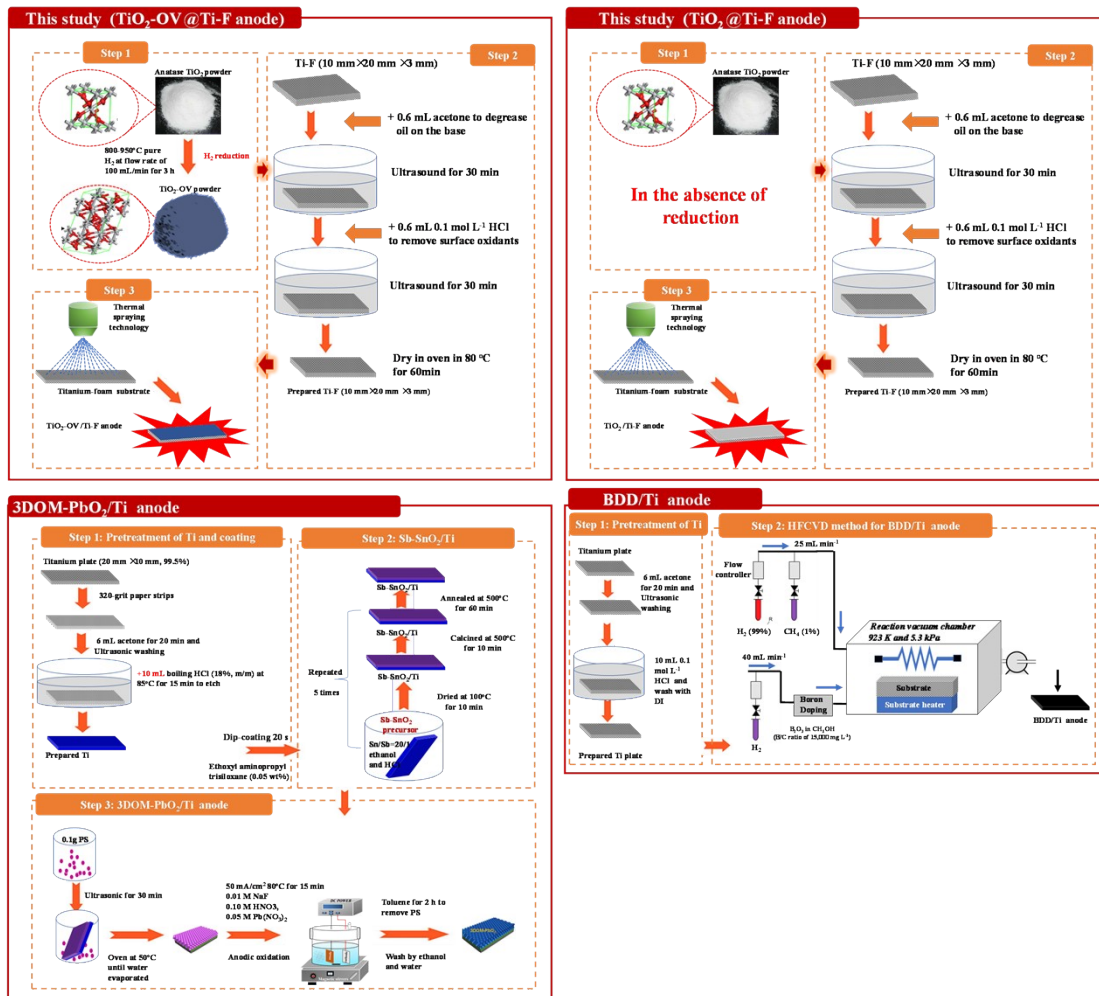

100

101 Fig. S3. Schematic representation of the production processes of the three anodic  
102 materials used for LCA

103 **Table S1.** Life cycle inventory of the three anodic materials based on one functional unit (1 cm×2 cm anodic plate) and the system boundaries  
 104 defined in this text  
 105

| The anode                                                                                               | The chemicals and electricity during fabrication                                                                                                                                       | The diagrams of the production processes                                                                                                                                                        |
|---------------------------------------------------------------------------------------------------------|----------------------------------------------------------------------------------------------------------------------------------------------------------------------------------------|-------------------------------------------------------------------------------------------------------------------------------------------------------------------------------------------------|
| <p style="text-align: center;"><b>1.</b><br/><b>TiO<sub>2</sub>-OV@Ti-F</b><br/><b>(this study)</b></p> | <p><b>Step 1:</b><br/>Pure H<sub>2</sub> (99.99%) 3.48×10<sup>-3</sup> mL<br/>The required electricity during reduction= (0.98-1.16) × 10<sup>-6</sup> kWh</p>                         | <div style="border: 2px solid red; padding: 10px;"> <p style="text-align: center; background-color: red; color: white; margin: 0;"><b>This study (TiO<sub>2</sub>-OV@Ti-F anode)</b></p> </div> |
|                                                                                                         | <p><b>Step 2:</b><br/>Ti-foam (1cm×2 cm) 1.3254 g<br/>Acetone 6 mL<br/>HCl 21.9 mg<br/>Ultrapure water 100 mL<br/>The required electricity for ultrasound =2.9×10<sup>-4</sup> kWh</p> |                                                                                                                                                                                                 |
|                                                                                                         | <p><b>Step 3:</b><br/>Pure Ar (99.99%) 3.51×10<sup>-2</sup> mL<br/>Pure H<sub>2</sub> (99.99%) 1.28×10<sup>-2</sup> mL<br/>The required electricity =2.54×10<sup>-4</sup> kWh</p>      |                                                                                                                                                                                                 |

|                                                                                                      |                                                                                                                                                                                                                                     |                                                                                                                                                                                                                                                                                                                 |
|------------------------------------------------------------------------------------------------------|-------------------------------------------------------------------------------------------------------------------------------------------------------------------------------------------------------------------------------------|-----------------------------------------------------------------------------------------------------------------------------------------------------------------------------------------------------------------------------------------------------------------------------------------------------------------|
| <p style="text-align: center;"><b>2.</b><br/><b>TiO<sub>2</sub>@Ti-F</b><br/><b>(this study)</b></p> | <p><b>Step 1:</b> in the absence of H<sub>2</sub> reduction<br/>         Pure H<sub>2</sub> (99.99%) 3.48×10<sup>-3</sup> mL<br/>         The required electricity during reduction= (0.98-1.16) × 10<sup>-6</sup> kWh</p>          | <div style="border: 2px solid red; padding: 10px;"> <p style="text-align: center; background-color: red; color: white; padding: 5px;"><b>This study (TiO<sub>2</sub>@Ti-F anode)</b></p> <p style="text-align: center; color: red; font-weight: bold; font-size: 1.2em;">In the absence of reduction</p> </div> |
|                                                                                                      | <p><b>Step 2:</b><br/>         Ti-foam (1cm×2 cm) 1.3254 g<br/>         Acetone 6 mL<br/>         HCl 21.9 mg<br/>         Ultrapure water 100 mL<br/>         The required electricity for ultrasound =2.9×10<sup>-4</sup> kWh</p> |                                                                                                                                                                                                                                                                                                                 |
|                                                                                                      | <p><b>Step 3:</b><br/>         Pure Ar (99.99%) 3.51×10<sup>-2</sup> mL<br/>         Pure H<sub>2</sub> (99.99%) 1.28×10<sup>-2</sup> mL<br/>         The required electricity =2.54×10<sup>-4</sup> kWh</p>                        |                                                                                                                                                                                                                                                                                                                 |
|                                                                                                      | <p><b>Step. 1 Ti pretreated</b><br/>         Ti base (1cm×2 cm) : 1.3254 g</p>                                                                                                                                                      |                                                                                                                                                                                                                                                                                                                 |



|                                                               |                                                                                                                                                                                                                                                                                                                                                                                                                                                                                                                                                                                                                                                                                                                                                                                                                                                                                                                          |  |
|---------------------------------------------------------------|--------------------------------------------------------------------------------------------------------------------------------------------------------------------------------------------------------------------------------------------------------------------------------------------------------------------------------------------------------------------------------------------------------------------------------------------------------------------------------------------------------------------------------------------------------------------------------------------------------------------------------------------------------------------------------------------------------------------------------------------------------------------------------------------------------------------------------------------------------------------------------------------------------------------------|--|
| <p><b>3.</b><br/><b>3DM-PbO<sub>2</sub>/Ti</b></p> <p>[6]</p> | <p>Acetone : 6 mL<br/>320 mesh sandpaper strip<br/>HCl: 180 mg<br/>Ultrapure water : 100 mL<br/>The electricity = <math>5.8 \times 10^{-4}</math> kwh</p> <p><b>Step. 2 dip-coating</b><br/>(Chemicals)<br/>ethoxyl aminopropyl trisiloxane 0.05 g<br/>SnCl<sub>4</sub>×5H<sub>2</sub>O 10g<br/>SbCl<sub>3</sub> 0.1g<br/>Ethanol 100 mL<br/>Concentrated HCl 1 mL<br/>Pure O<sub>2</sub>=0.095 mL<br/>The energy used to heat using tube furnace=<math>6.38 \times 10^{-6}</math> kwh</p> <p><b>Step. 3</b><br/>Polystyrene sphere 0.1 g<br/>0.042g NaF, 0.63 g HNO<sub>3</sub><br/>1.66 g Pb(NO<sub>3</sub>)<sub>2</sub>, 100 g ultrapure water<br/>Ethanol 10 mL<br/>The electricity during anodic oxidation : <math>8 \times 10^{-4}</math> kwh (current 0.4A , potential 20 V)<br/>The required electricity during anodic oxidation<br/>The electricity used to remove PS = <math>1.2 \times 10^{-6}</math> kwh</p> |  |
| <p><b>4.</b><br/><b>BDD/Ti Anode</b></p>                      | <p><b>hot filament chemical vapor deposition (HFCVD) technique</b></p>                                                                                                                                                                                                                                                                                                                                                                                                                                                                                                                                                                                                                                                                                                                                                                                                                                                   |  |

|            |                                                                                                                                                                                                                                      |  |
|------------|--------------------------------------------------------------------------------------------------------------------------------------------------------------------------------------------------------------------------------------|--|
| <p>[4]</p> | <p><b>Step. 1</b><br/>         Acetone 6 mL<br/>         HCl 0.8 mL<br/>         The required electricity=<math>5.0 \times 10^{-4}</math> kWh</p>                                                                                    |  |
|            | <p><b>Step 2:</b><br/>         H<sub>2</sub> 225.7 mL<br/>         CH<sub>4</sub> 87.2 mL<br/>         B<sub>2</sub>O<sub>3</sub> 4800 mg<br/>         CH<sub>3</sub>OH 320 mL<br/>         The required electricity =43.608 kWh</p> |  |

106

107

108

109

110

111

112

113

114

115

116

117

**Table S2.** Results of Monte Carlo simulation for assessing the environmental impact of TiO<sub>2</sub>-OV@Ti-F

| Impact categories                                | Units  | Mean TEI | Standard deviation | Minimum TEI | Maximum TEI | Median TEI | 5% Percentile | 95% Percentile |
|--------------------------------------------------|--------|----------|--------------------|-------------|-------------|------------|---------------|----------------|
| ecosystem quality - agricultural land occupation | points | 1.72E-06 | 1.68E-07           | 1.18E-06    | 2.27E-06    | 1.73E-06   | 1.43E-06      | 1.97E-06       |
| ecosystem quality - climate change, ecosystems   | points | 1.32E-03 | 1.09E-04           | 9.70E-04    | 1.67E-03    | 1.32E-03   | 1.13E-03      | 1.49E-03       |
| ecosystem quality - freshwater ecotoxicity       | points | 6.01E-07 | 5.21E-08           | 4.37E-07    | 7.71E-07    | 6.04E-07   | 5.07E-07      | 6.80E-07       |
| ecosystem quality - freshwater eutrophication    | points | 1.45E-06 | 1.37E-07           | 1.02E-06    | 1.90E-06    | 1.46E-06   | 1.21E-06      | 1.66E-06       |
| ecosystem quality - marine ecotoxicity           | points | 1.71E-04 | 1.63E-05           | 1.20E-04    | 2.25E-04    | 1.72E-04   | 1.42E-04      | 1.96E-04       |
| ecosystem quality - natural land transformation  | points | 4.12E-04 | 3.89E-05           | 2.89E-04    | 5.39E-04    | 4.13E-04   | 3.43E-04      | 4.70E-04       |
| ecosystem quality - terrestrial acidification    | points | 4.97E-06 | 4.13E-07           | 3.65E-06    | 6.31E-06    | 4.99E-06   | 4.25E-06      | 5.61E-06       |
| ecosystem quality - terrestrial ecotoxicity      | points | 4.19E-06 | 3.63E-07           | 3.05E-06    | 5.38E-06    | 4.21E-06   | 3.54E-06      | 4.74E-06       |
| ecosystem quality - total                        | points | 1.93E-03 | 1.66E-04           | 1.40E-03    | 2.47E-03    | 1.94E-03   | 1.63E-03      | 2.18E-03       |
| ecosystem quality - urban land occupation        | points | 1.37E-05 | 1.31E-06           | 9.53E-06    | 1.80E-05    | 1.37E-05   | 1.14E-05      | 1.57E-05       |
| human health - climate change, human health      | points | 1.66E-03 | 1.38E-04           | 1.22E-03    | 2.10E-03    | 1.67E-03   | 1.42E-03      | 1.87E-03       |
| human health - human toxicity                    | points | 4.86E-03 | 4.64E-04           | 3.39E-03    | 6.37E-03    | 4.87E-03   | 4.03E-03      | 5.55E-03       |
| human health - ionising radiation                | points | 7.79E-07 | 7.56E-08           | 5.38E-07    | 1.03E-06    | 7.80E-07   | 6.45E-07      | 8.90E-07       |
| human health - ozone depletion                   | points | 1.24E-07 | 1.19E-08           | 8.58E-08    | 1.62E-07    | 1.24E-07   | 1.03E-07      | 1.41E-07       |
| human health - particulate matter formation      | points | 2.94E-04 | 2.61E-05           | 2.13E-04    | 3.79E-04    | 2.95E-04   | 2.48E-04      | 3.34E-04       |
| human health - photochemical oxidant formation   | points | 2.37E-05 | 1.67E-06           | 1.80E-05    | 2.87E-05    | 2.37E-05   | 2.09E-05      | 2.64E-05       |
| human health - total                             | points | 6.83E-03 | 6.27E-04           | 4.87E-03    | 8.89E-03    | 6.85E-03   | 5.73E-03      | 7.77E-03       |
| resources - fossil depletion                     | points | 2.20E-03 | 1.58E-04           | 1.69E-03    | 2.68E-03    | 2.21E-03   | 1.94E-03      | 2.45E-03       |
| resources - metal depletion                      | points | 1.23E-04 | 1.19E-05           | 8.56E-05    | 1.62E-04    | 1.24E-04   | 1.02E-04      | 1.41E-04       |
| resources - total                                | points | 2.33E-03 | 1.68E-04           | 1.78E-03    | 2.84E-03    | 2.33E-03   | 2.04E-03      | 2.59E-03       |
| Total environmental impacts                      | points | 1.11E-02 | 9.50E-04           | 8.09E-03    | 1.42E-02    | 1.11E-02   | 9.41E-03      | 1.25E-02       |

118

119

120

**Table S3.** Results of Monte Carlo simulation for assessing the environmental impact of TiO<sub>2</sub> @Ti-F

| Impact categories                                | Units  | Mean TEI | Standard deviation | Minimum TEI | Maximum TEI | Median TEI | 5% Percentile | 95% Percentile |
|--------------------------------------------------|--------|----------|--------------------|-------------|-------------|------------|---------------|----------------|
| ecosystem quality - agricultural land occupation | points | 1.46E-06 | 1.43E-07           | 1.00E-06    | 1.93E-06    | 1.47E-06   | 1.22E-06      | 1.67E-06       |

|                                                 |        |          |          |          |          |          |          |          |
|-------------------------------------------------|--------|----------|----------|----------|----------|----------|----------|----------|
| ecosystem quality - climate change, ecosystems  | points | 1.12E-03 | 9.27E-05 | 8.25E-04 | 1.42E-03 | 1.12E-03 | 9.61E-04 | 1.27E-03 |
| ecosystem quality - freshwater ecotoxicity      | points | 5.11E-07 | 4.43E-08 | 3.71E-07 | 6.55E-07 | 5.13E-07 | 4.31E-07 | 5.78E-07 |
| ecosystem quality - freshwater eutrophication   | points | 1.23E-06 | 1.16E-07 | 8.67E-07 | 1.62E-06 | 1.24E-06 | 1.03E-06 | 1.41E-06 |
| ecosystem quality - marine ecotoxicity          | points | 1.45E-04 | 1.39E-05 | 1.02E-04 | 1.91E-04 | 1.46E-04 | 1.21E-04 | 1.67E-04 |
| ecosystem quality - natural land transformation | points | 3.50E-04 | 3.31E-05 | 2.46E-04 | 4.58E-04 | 3.51E-04 | 2.92E-04 | 4.00E-04 |
| ecosystem quality - terrestrial acidification   | points | 4.22E-06 | 3.51E-07 | 3.10E-06 | 5.36E-06 | 4.24E-06 | 3.61E-06 | 4.77E-06 |
| ecosystem quality - terrestrial ecotoxicity     | points | 3.56E-06 | 3.09E-07 | 2.59E-06 | 4.57E-06 | 3.58E-06 | 3.01E-06 | 4.03E-06 |
| ecosystem quality - total                       | points | 1.54E-03 | 1.33E-04 | 1.12E-03 | 1.98E-03 | 1.55E-03 | 1.30E-03 | 1.74E-03 |
| ecosystem quality - urban land occupation       | points | 1.16E-05 | 1.11E-06 | 8.10E-06 | 1.53E-05 | 1.16E-05 | 9.69E-06 | 1.33E-05 |
| human health - climate change, human health     | points | 1.41E-03 | 1.17E-04 | 1.04E-03 | 1.79E-03 | 1.42E-03 | 1.21E-03 | 1.59E-03 |
| human health - human toxicity                   | points | 4.13E-03 | 3.94E-04 | 2.88E-03 | 5.41E-03 | 4.14E-03 | 3.43E-03 | 4.72E-03 |
| human health - ionising radiation               | points | 6.62E-07 | 6.43E-08 | 4.57E-07 | 8.76E-07 | 6.63E-07 | 5.48E-07 | 7.57E-07 |
| human health - ozone depletion                  | points | 1.05E-07 | 1.01E-08 | 7.29E-08 | 1.38E-07 | 1.05E-07 | 8.76E-08 | 1.20E-07 |
| human health - particulate matter formation     | points | 2.50E-04 | 2.22E-05 | 1.81E-04 | 3.22E-04 | 2.51E-04 | 2.11E-04 | 2.84E-04 |
| human health - photochemical oxidant formation  | points | 2.01E-05 | 1.42E-06 | 1.53E-05 | 2.44E-05 | 2.01E-05 | 1.78E-05 | 2.24E-05 |
| human health - total                            | points | 5.81E-03 | 5.33E-04 | 4.14E-03 | 7.56E-03 | 5.82E-03 | 4.87E-03 | 6.60E-03 |
| resources - fossil depletion                    | points | 1.87E-03 | 1.34E-04 | 1.44E-03 | 2.28E-03 | 1.88E-03 | 1.65E-03 | 2.08E-03 |
| resources - metal depletion                     | points | 1.05E-04 | 1.01E-05 | 7.28E-05 | 1.38E-04 | 1.05E-04 | 8.67E-05 | 1.20E-04 |
| resources - total                               | points | 1.93E-03 | 1.39E-04 | 1.48E-03 | 2.36E-03 | 1.93E-03 | 1.69E-03 | 2.15E-03 |
| Total environmental impacts                     | points | 9.44E-03 | 8.08E-04 | 6.88E-03 | 1.21E-02 | 9.44E-03 | 8.00E-03 | 1.06E-02 |

121

122

123

124

125

**Table S4.** Results of Monte Carlo simulation for assessing the environmental impact of 3DM-PbO<sub>2</sub>/Ti

| Impact categories                                | Units  | Mean TEI | Standard deviation | Minimum TEI | Maximum TEI | Median TEI | 5% Percentile | 95% Percentile |
|--------------------------------------------------|--------|----------|--------------------|-------------|-------------|------------|---------------|----------------|
| ecosystem quality - agricultural land occupation | points | 1.72E-06 | 1.68E-07           | 1.18E-06    | 2.27E-06    | 1.73E-06   | 1.43E-06      | 1.97E-06       |
| ecosystem quality - climate change, ecosystems   | points | 1.32E-03 | 1.09E-04           | 9.70E-04    | 1.67E-03    | 1.32E-03   | 1.13E-03      | 1.49E-03       |
| ecosystem quality - freshwater ecotoxicity       | points | 6.01E-07 | 5.21E-08           | 4.37E-07    | 7.71E-07    | 6.04E-07   | 5.07E-07      | 6.80E-07       |

|                                                 |        |          |          |          |          |          |          |          |
|-------------------------------------------------|--------|----------|----------|----------|----------|----------|----------|----------|
| ecosystem quality - freshwater eutrophication   | points | 1.45E-06 | 1.37E-07 | 1.02E-06 | 1.90E-06 | 1.46E-06 | 1.21E-06 | 1.66E-06 |
| ecosystem quality - marine ecotoxicity          | points | 1.71E-04 | 1.63E-05 | 1.20E-04 | 2.25E-04 | 1.72E-04 | 1.42E-04 | 1.96E-04 |
| ecosystem quality - natural land transformation | points | 4.12E-04 | 3.89E-05 | 2.89E-04 | 5.39E-04 | 4.13E-04 | 3.43E-04 | 4.70E-04 |
| ecosystem quality - terrestrial acidification   | points | 4.97E-06 | 4.13E-07 | 3.65E-06 | 6.31E-06 | 4.99E-06 | 4.25E-06 | 5.61E-06 |
| ecosystem quality - terrestrial ecotoxicity     | points | 4.19E-06 | 3.63E-07 | 3.05E-06 | 5.38E-06 | 4.21E-06 | 3.54E-06 | 4.74E-06 |
| ecosystem quality - total                       | points | 1.93E-03 | 1.66E-04 | 1.40E-03 | 2.47E-03 | 1.94E-03 | 1.63E-03 | 2.18E-03 |
| ecosystem quality - urban land occupation       | points | 1.37E-05 | 1.31E-06 | 9.53E-06 | 1.80E-05 | 1.37E-05 | 1.14E-05 | 1.57E-05 |
| human health - climate change, human health     | points | 1.66E-03 | 1.38E-04 | 1.22E-03 | 2.10E-03 | 1.67E-03 | 1.42E-03 | 1.87E-03 |
| human health - human toxicity                   | points | 4.86E-03 | 4.64E-04 | 3.39E-03 | 6.37E-03 | 4.87E-03 | 4.03E-03 | 5.55E-03 |
| human health - ionising radiation               | points | 7.79E-07 | 7.56E-08 | 5.38E-07 | 1.03E-06 | 7.80E-07 | 6.45E-07 | 8.90E-07 |
| human health - ozone depletion                  | points | 1.24E-07 | 1.19E-08 | 8.58E-08 | 1.62E-07 | 1.24E-07 | 1.03E-07 | 1.41E-07 |
| human health - particulate matter formation     | points | 2.94E-04 | 2.61E-05 | 2.13E-04 | 3.79E-04 | 2.95E-04 | 2.48E-04 | 3.34E-04 |
| human health - photochemical oxidant formation  | points | 2.37E-05 | 1.67E-06 | 1.80E-05 | 2.87E-05 | 2.37E-05 | 2.09E-05 | 2.64E-05 |
| human health - total                            | points | 6.83E-03 | 6.27E-04 | 4.87E-03 | 8.89E-03 | 6.85E-03 | 5.73E-03 | 7.77E-03 |
| resources - fossil depletion                    | points | 2.20E-03 | 1.58E-04 | 1.69E-03 | 2.68E-03 | 2.21E-03 | 1.94E-03 | 2.45E-03 |
| resources - metal depletion                     | points | 1.23E-04 | 1.19E-05 | 8.56E-05 | 1.62E-04 | 1.24E-04 | 1.02E-04 | 1.41E-04 |
| resources - total                               | points | 2.33E-03 | 1.68E-04 | 1.78E-03 | 2.84E-03 | 2.33E-03 | 2.04E-03 | 2.59E-03 |
| Total environmental impacts                     | points | 1.11E-02 | 9.50E-04 | 8.09E-03 | 1.42E-02 | 1.11E-02 | 9.41E-03 | 1.25E-02 |

126  
127  
128

**Table S5.** Results of Monte Carlo simulation for assessing the environmental impact of BDD/Ti

| <b>Impact categories</b>                         | <b>Units</b> | <b>Mean TEI</b> | <b>Standard deviation</b> | <b>Minimum TEI</b> | <b>Maximum TEI</b> | <b>Median TEI</b> | <b>5% Percentile</b> | <b>95% Percentile</b> |
|--------------------------------------------------|--------------|-----------------|---------------------------|--------------------|--------------------|-------------------|----------------------|-----------------------|
| ecosystem quality - agricultural land occupation | points       | 1.72E-06        | 1.68E-07                  | 1.18E-06           | 2.27E-06           | 1.73E-06          | 1.43E-06             | 1.97E-06              |
| ecosystem quality - climate change, ecosystems   | points       | 1.32E-03        | 1.09E-04                  | 9.70E-04           | 1.67E-03           | 1.32E-03          | 1.13E-03             | 1.49E-03              |
| ecosystem quality - freshwater ecotoxicity       | points       | 6.01E-07        | 5.21E-08                  | 4.37E-07           | 7.71E-07           | 6.04E-07          | 5.07E-07             | 6.80E-07              |
| ecosystem quality - freshwater eutrophication    | points       | 1.45E-06        | 1.37E-07                  | 1.02E-06           | 1.90E-06           | 1.46E-06          | 1.21E-06             | 1.66E-06              |
| ecosystem quality - marine ecotoxicity           | points       | 1.71E-04        | 1.63E-05                  | 1.20E-04           | 2.25E-04           | 1.72E-04          | 1.42E-04             | 1.96E-04              |
| ecosystem quality - natural land transformation  | points       | 4.12E-04        | 3.89E-05                  | 2.89E-04           | 5.39E-04           | 4.13E-04          | 3.43E-04             | 4.70E-04              |
| ecosystem quality - terrestrial acidification    | points       | 4.97E-06        | 4.13E-07                  | 3.65E-06           | 6.31E-06           | 4.99E-06          | 4.25E-06             | 5.61E-06              |

|                                                |        |          |          |          |          |          |          |          |
|------------------------------------------------|--------|----------|----------|----------|----------|----------|----------|----------|
| ecosystem quality - terrestrial ecotoxicity    | points | 4.19E-06 | 3.63E-07 | 3.05E-06 | 5.38E-06 | 4.21E-06 | 3.54E-06 | 4.74E-06 |
| ecosystem quality - total                      | points | 1.93E-03 | 1.66E-04 | 1.40E-03 | 2.47E-03 | 1.94E-03 | 1.63E-03 | 2.18E-03 |
| ecosystem quality - urban land occupation      | points | 1.37E-05 | 1.31E-06 | 9.53E-06 | 1.80E-05 | 1.37E-05 | 1.14E-05 | 1.57E-05 |
| human health - climate change, human health    | points | 1.66E-03 | 1.38E-04 | 1.22E-03 | 2.10E-03 | 1.67E-03 | 1.42E-03 | 1.87E-03 |
| human health - human toxicity                  | points | 4.86E-03 | 4.64E-04 | 3.39E-03 | 6.37E-03 | 4.87E-03 | 4.03E-03 | 5.55E-03 |
| human health - ionising radiation              | points | 7.79E-07 | 7.56E-08 | 5.38E-07 | 1.03E-06 | 7.80E-07 | 6.45E-07 | 8.90E-07 |
| human health - ozone depletion                 | points | 1.24E-07 | 1.19E-08 | 8.58E-08 | 1.62E-07 | 1.24E-07 | 1.03E-07 | 1.41E-07 |
| human health - particulate matter formation    | points | 2.94E-04 | 2.61E-05 | 2.13E-04 | 3.79E-04 | 2.95E-04 | 2.48E-04 | 3.34E-04 |
| human health - photochemical oxidant formation | points | 2.37E-05 | 1.67E-06 | 1.80E-05 | 2.87E-05 | 2.37E-05 | 2.09E-05 | 2.64E-05 |
| human health - total                           | points | 6.83E-03 | 6.27E-04 | 4.87E-03 | 8.89E-03 | 6.85E-03 | 5.73E-03 | 7.77E-03 |
| resources - fossil depletion                   | points | 2.20E-03 | 1.58E-04 | 1.69E-03 | 2.68E-03 | 2.21E-03 | 1.94E-03 | 2.45E-03 |
| resources - metal depletion                    | points | 1.23E-04 | 1.19E-05 | 8.56E-05 | 1.62E-04 | 1.24E-04 | 1.02E-04 | 1.41E-04 |
| resources - total                              | points | 2.33E-03 | 1.68E-04 | 1.78E-03 | 2.84E-03 | 2.33E-03 | 2.04E-03 | 2.59E-03 |
| Total environmental impacts                    | points | 1.11E-02 | 9.50E-04 | 8.09E-03 | 1.42E-02 | 1.11E-02 | 9.41E-03 | 1.25E-02 |

130 **Table S6.** Percentage contents of Ti and O in Ti-F and TiO<sub>2</sub>-OV@Ti-F anodes  
 131 derived from SEM-EDS

132

| Elements                  | Ti atom (%) | O atom (%) |
|---------------------------|-------------|------------|
| Ti-F                      | 97.00       | 3.00       |
| TiO <sub>2</sub> -OV@Ti-F | 87.00       | 13.00      |

133

134

135

136

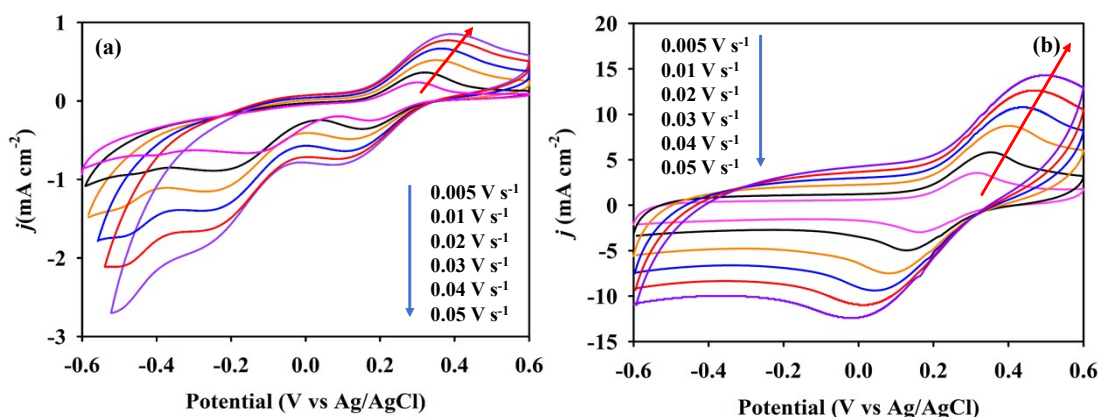

137

138 **Fig. S4.** Cyclic voltammograms of Ti-F, (a), and TiO<sub>2</sub>-OV@Ti-F, (b), electrodes at different scan  
 139 rates in supporting electrolyte containing 5 mM K<sub>3</sub>[Fe(CN)<sub>6</sub>] and 0.1 M KCl at room temperature.

140

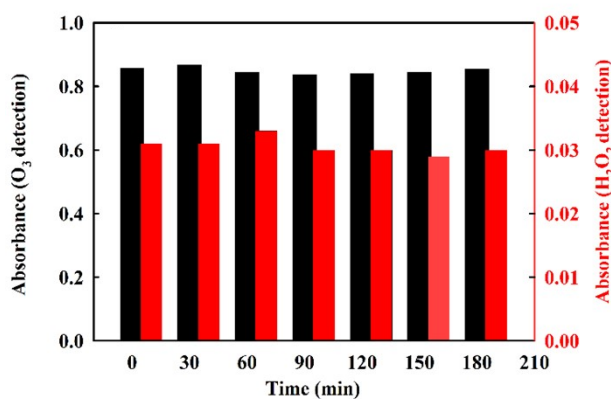

141

142 **Fig. S5.** Detection of O<sub>3</sub> and H<sub>2</sub>O<sub>2</sub> on anode using Pt sheet cathode and TiO<sub>2</sub>-  
 143 OV@Ti-F anode at [Na<sub>2</sub>SO<sub>4</sub>] = 50 mM and current density=25 mA cm<sup>-2</sup>.

144

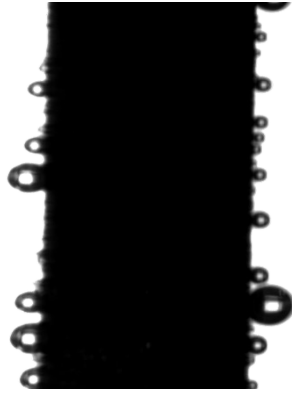

145

146 **Fig. S6.** Gas bubble on the static  $\text{TiO}_2\text{-OV@Ti-F}$  anode observed by camera (AFT-  
 147 ZL0920). Conditions:  $[\text{Na}_2\text{SO}_4] = 50 \text{ mM}$  and current density =  $25 \text{ mA cm}^{-2}$ .

148

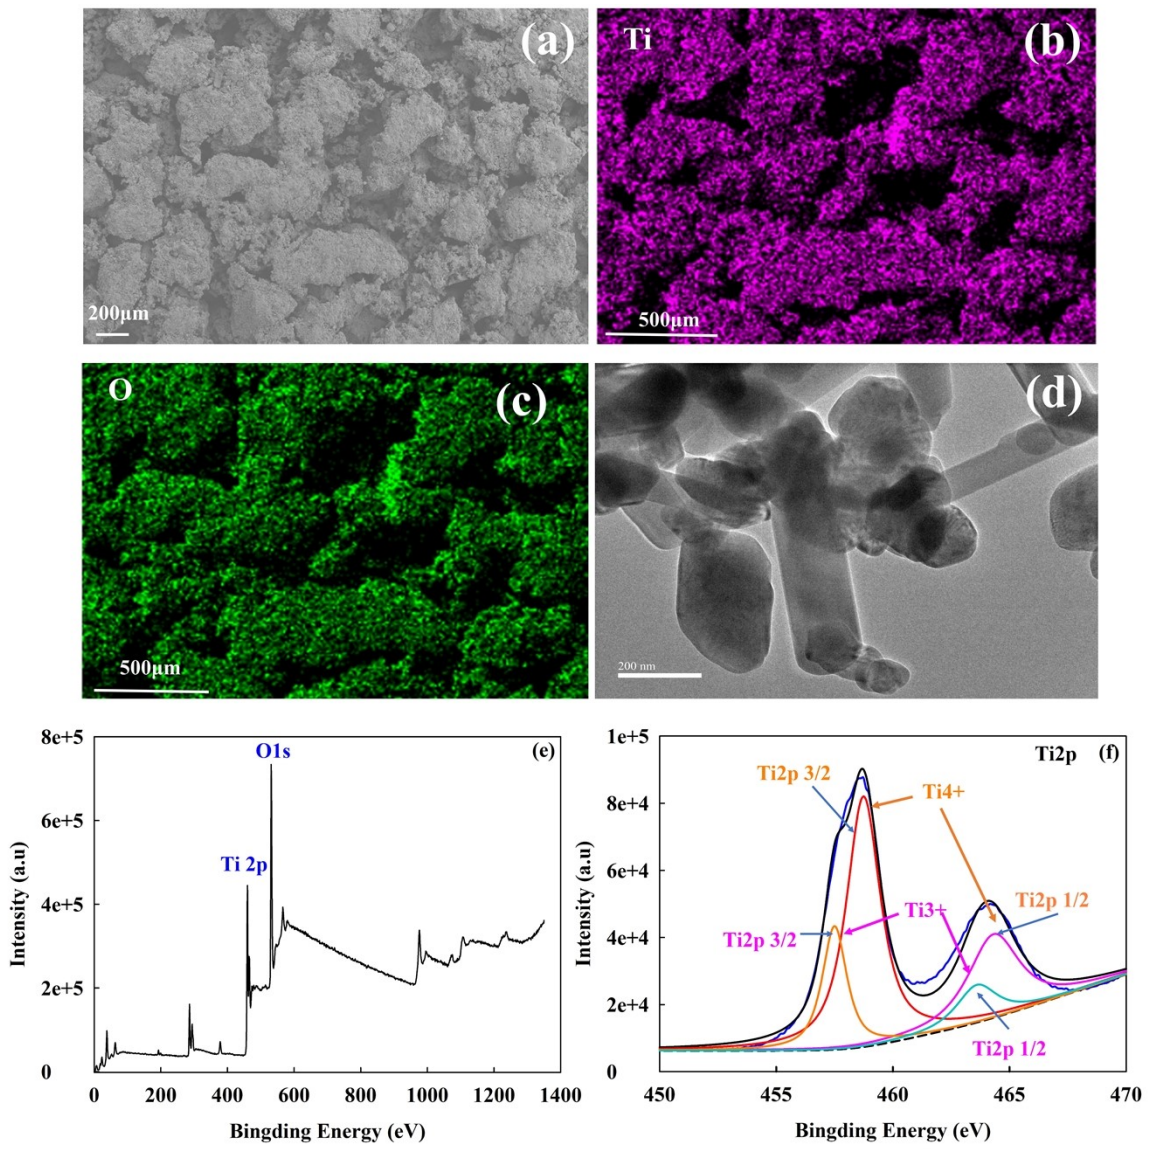

149



150

151 **Fig. S7. (a-c)** SEM images and (d) HRTEM, (c) whole spectrum (d) Ti2p of the  
152 regenerated TiO<sub>2</sub>-OV@Ti-F anode

153

154

155 After fitting the Ti2p spectrum (Fig. S6c-d), we could deduce that the binding energy  
156 peaks at 464.07 and 458.78 eV are corresponded to 2p<sub>1/2</sub> and 2p<sub>3/2</sub> of Ti<sup>4+</sup>, while  
157 binding energy at 463.73 eV and 457.49 eV are related to 2p<sub>1/2</sub> and 2p<sub>3/2</sub> of Ti<sup>3+</sup> [7].

158 Based on the fitting area, the concentration of Ti<sup>3+</sup> was approximately 26.32%.

159

160

161

162
